# Supplementary material for: Acrylate-assisted fractal nanostructured polymer dispersed liquid crystal droplet based vibrant colored smart-windows
Source: Royal Society of Chemistry journal article supplement (doi:10.1039/c9ra00729f), 2019-01-01
Supplement: c9ra00729f1.pdf [file c9ra00729f1.pdf]

Supporting information

**Acrylate-assisted Fractal Nanostructured Polymer Dispersed Liquid Crystals Droplets  
Based Vibrant Colored Smart-Windows**

Sunil Kumar<sup>1,2</sup>, Hyeryeon Hong<sup>2</sup>, Woosuk Choi<sup>2</sup>, Imtisal Akhtar<sup>2</sup>, Malik Abdul Rehman<sup>2</sup>,  
Yongho Seo<sup>1,2\*</sup>

*<sup>1</sup>Graphene Research Institute and HMC, Sejong University, Seoul, 05006, South Korea*

*<sup>2</sup>Department of Nanotechnology and Advanced Materials Engineering, Sejong University, Seoul,  
05006, South Korea*

*\*corresponding author: yseo@sejong.ac.kr*

## 1. $\Delta T$ for different PDLCs compositions

PDLCs were fabricated with the LCs (~55wt.%) and TEGDA (45wt.%) only, another PDLCs fabricated using LCs (55wt.%) with TMPDE (22.5wt.%) and the TMPTMP (22.5wt.%) to check the effect of the TEGDA with TMPDE and the TMPTMP combination. Also, LCs (55wt.%) NOA65 (~45wt.%) with and without red and blue dyes (both 0.7wt.%, separately) based PDLCs were fabricated for a color comparison at similar LCs, monomers, and dyes concentrations. The associated parameters are shown in Table S1, and the corresponding colors of PDLCs are shown in Figure S2.

**Table S1.  $\Delta T$  (%) for different PDLCs compositions. The numbers in brackets are concentration in wt.%**

| S. No. | PDLCs composition (concentration, wt.%)                                 | $\Delta T$ (%) | Remark                  |
|--------|-------------------------------------------------------------------------|----------------|-------------------------|
| 1.     | LCs (55) + TEGDA (45)                                                   | 31             | Low $\Delta T$          |
| 2.     | LCs (55) + TEMPDE (22.5) + TMPTMP (22.5)                                | 35             | Low $\Delta T$          |
| 3.     | LCs (55) + NOA65 (45)                                                   | 67             | Low $\Delta T$          |
| 4.     | LCs (54.3) + NOA65 (45) + red dye AR1 (0.7)                             | 61             | Color changes to yellow |
| 5.     | LCs (54.3) + NOA65 (45) + blue dye AB4(0.7%)                            | 54             | Color changes to yellow |
| 6.     | LCs (54.3) + TEGDA (27) + TEMPDE (8) + TMPTMP (10) + blue dye AB4 (0.7) | 60             | Color remains blue      |

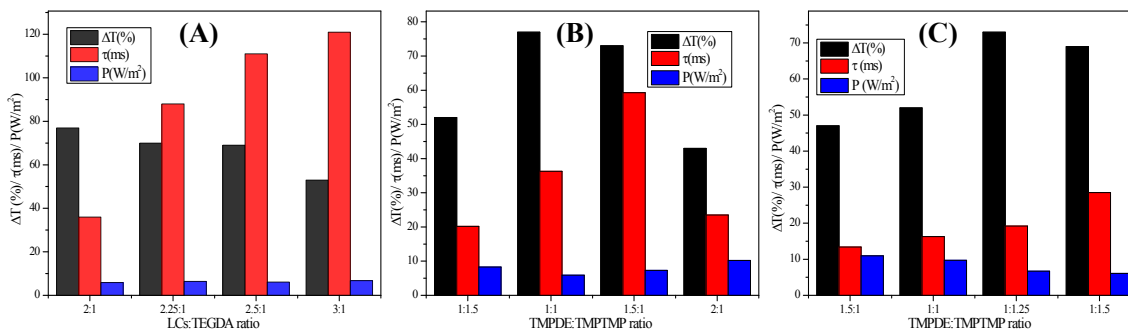

**Figure S1. Variation of  $\Delta T$  (%), power (P) and switching time ( $\tau$ ) at (A) different LCs/TEGDA ratio, (B) non-dye PDLCs, and (C) red colored PDLCs**

## 2. Photographs in OFF/ON states of various PDLCs

LCs with TEGDA only (Figure S2 (A-A1)), and LCs with TMPDE and TMPTMP based PDLCs (Figure S2 (B-B1)) have low  $\Delta T$ ,  $\sim 31\%$  and  $35\%$ , respectively. In the case of NOA65 based PDLCs with non-dye, red, and blue dye based PDLCs (Figure S2 (C-E1)), it was  $\sim 67\%$ ,  $\sim 61\%$ , and  $\sim 54\%$  respectively, under similar conditions. After UV-curing the color of NOA65 based PDLCs with the blue or red dye was changed to a yellowish color with reduced transmittance (Figure S2 (D-E)). However, in the case of TEGDA/TMPDE/TMPTMP based PDLCs with blue dye, the color remains the same and  $\Delta T(\%) \sim 60\%$  (Figure S2 (F/F1)). The color change in NOA65 based PDLCs may be due to the fact that NOA65 has photoinitiator like benzophenone and isophorone diisocyanate (IPDI) additionally, whereas the other PDLCs have no photoinitiator.

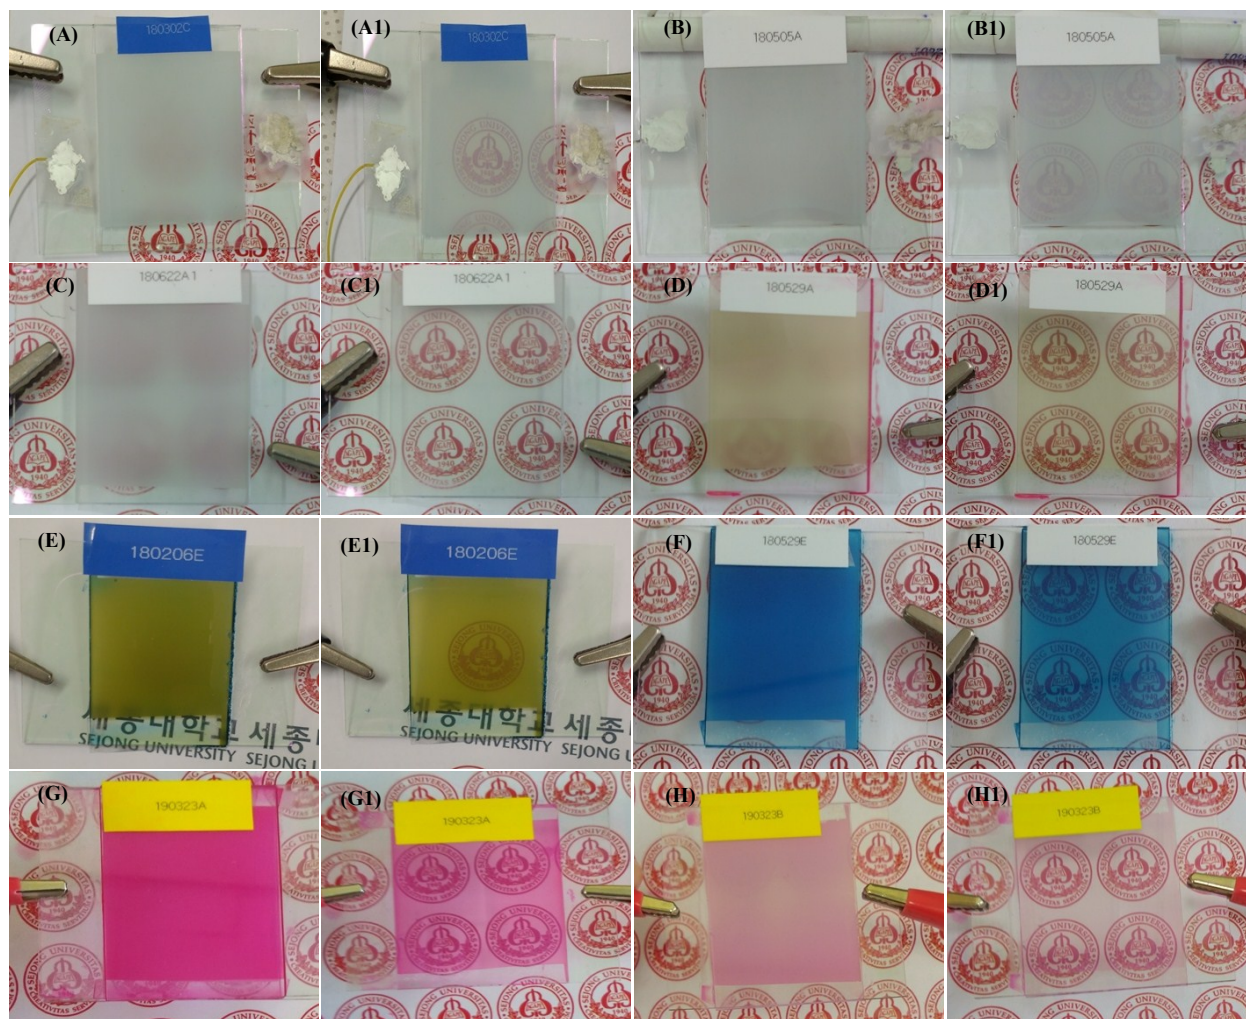

**Figure S2. Photographs in OFF/ON states of various PDLCs: (A/A1) LCs+ TEGDA, (B/B1) LCs+ TMPDE+ TMPTMP, (C/C1) LCs+ NOA65, (D/D1) LCs+ NOA65 + red AR1 dye, (E/E1) LCs+ NOA65+ blue AB4 dye, (F/F1) LCs+ TEGDA+ TMPDE+ TMPTMP+ blue AB4 dye, (G/G1) LCs+ TEGDA+ TMPDE+ TMPTMP+ 1wt.% red AR1 dye, and (H/H1) LCs+ TEGDA+ TMPDE+ TMPTMP+ 0.5wt.% red AR1 dye based PDLCs.**

### 3. Chemical formulas for PDLC ingredients

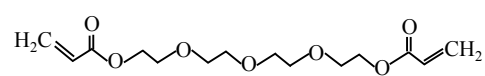

TEGDA

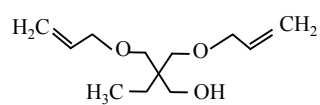

TMPDE

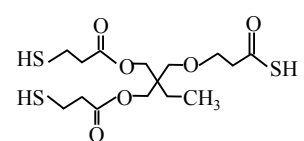

TMPTMP

**Figure S3. Chemical formulas of TEGDA, TMPDE, and TMPTMP. TEGDA and TMPDE have two double C=C bonds.**
